# Supplementary material for: A general approach for synthesis of functional metal oxide nanotubes and their application in dye-sensitized solar cells
Source: Royal Society of Chemistry journal article supplement (doi:10.1039/c3ra45506h), 2013-11-07
Supplement: c3ra45506h.pdf [file c3ra45506h.pdf]

## Supporting Information

### A General Approach for Synthesis of Functional Metal Oxide Nanotubes and their Application in Dye-sensitized Solar Cells

Parthiban Ramasamy, Da-Hye Lim, Jungsu Kim and Jinkwon Kim\*

*Department of Chemistry and GETRC, Kongju National University, 182, Shinkwondong, Kongju, 314-701,  
Chungnam-do, Republic of Korea.*

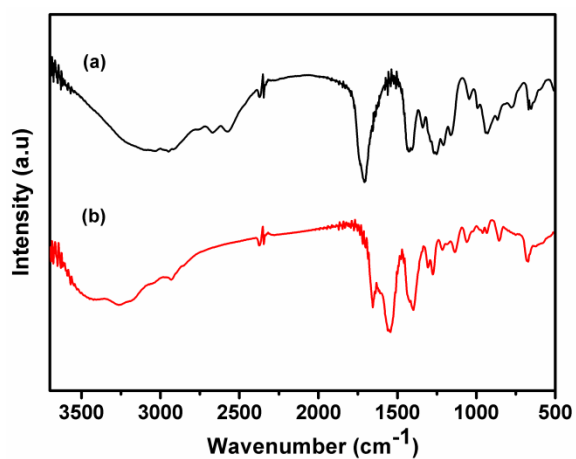

Fig. S1 FT- IR spectra of (a) MPA and (b) Se NWs functionalized with Mercaptopropionic acid.

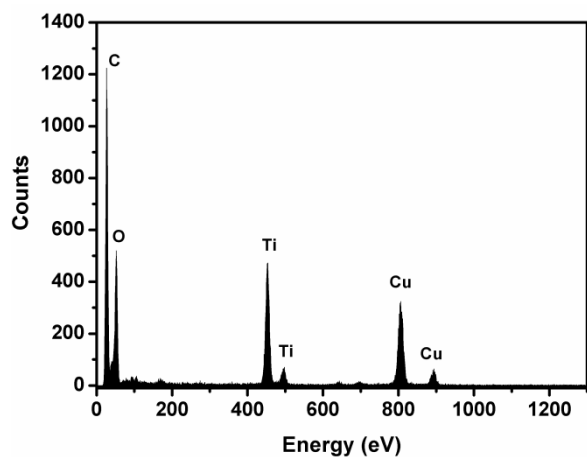

Fig. S2 EDS spectrum of TiO<sub>2</sub> nanotubes.

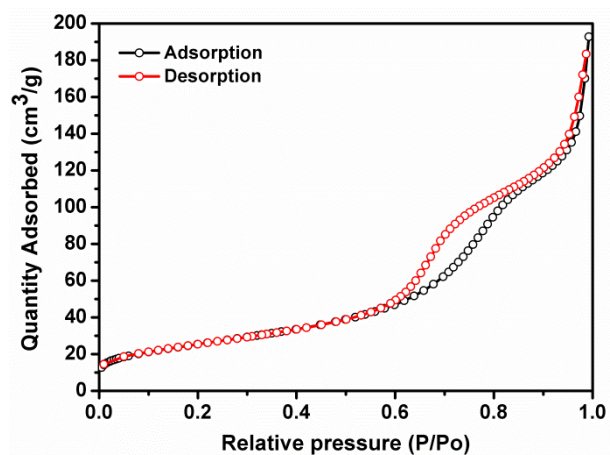

Fig. S3 Nitrogen adsorption-desorption isotherms of TiO<sub>2</sub> nanotubes.

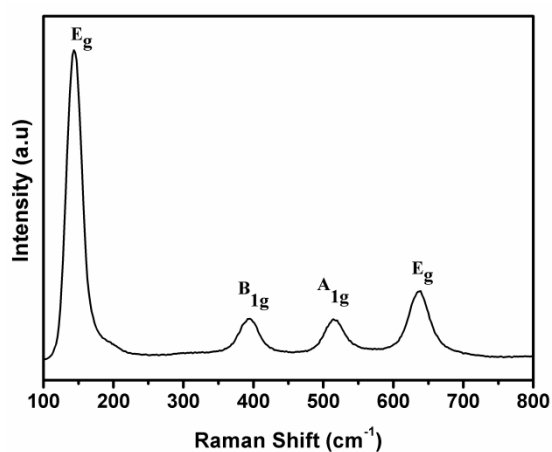

Fig. S4 Raman spectrum of TiO<sub>2</sub> nanotubes. The major Raman peaks observed at 144, 394, 516 and 637 cm<sup>-1</sup> can be attributed to E<sub>g</sub>, B<sub>1g</sub>, A<sub>1g</sub> and E<sub>g</sub> modes of anatase TiO<sub>2</sub>. It is well known that the E<sub>g</sub> peak is mainly due to symmetric stretching vibration of O-Ti-O, the B<sub>1g</sub> peak is caused by symmetric bending vibration of O-Ti-O, and the A<sub>1g</sub> peak is corresponds to anti-symmetric bending vibration of O-Ti-O in TiO<sub>2</sub>.

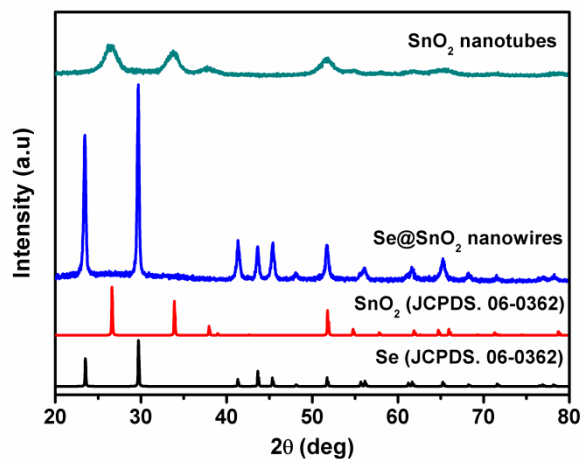

Fig. S5. XRD patterns of Se@SnO<sub>2</sub> core-shell nanowires and SnO<sub>2</sub> nanotubes.

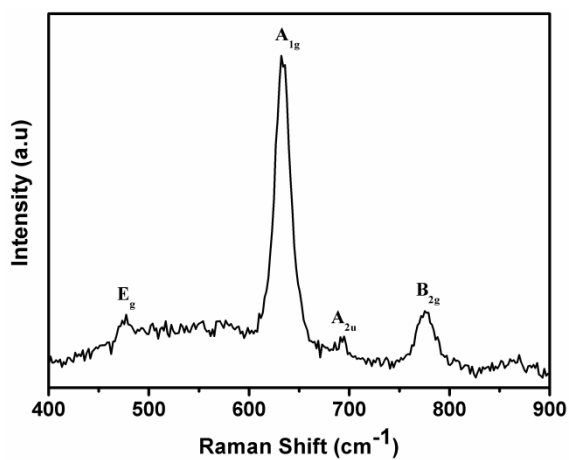

Fig. S6 Room-temperature Raman spectrum of SnO<sub>2</sub> nanotubes. The Raman scattering peaks at 475, 632, and 775 cm<sup>-1</sup> correspond to the E<sub>g</sub>, A<sub>1g</sub>, and B<sub>2g</sub> vibrational modes, respectively. Thus, these Raman peaks further confirmed the tetragonal rutile structure of the as-synthesized SnO<sub>2</sub> nanotubes. The Raman peak at 694 cm<sup>-1</sup> can be assigned to the IR-active LO A<sub>2u</sub> mode of SnO<sub>2</sub>.

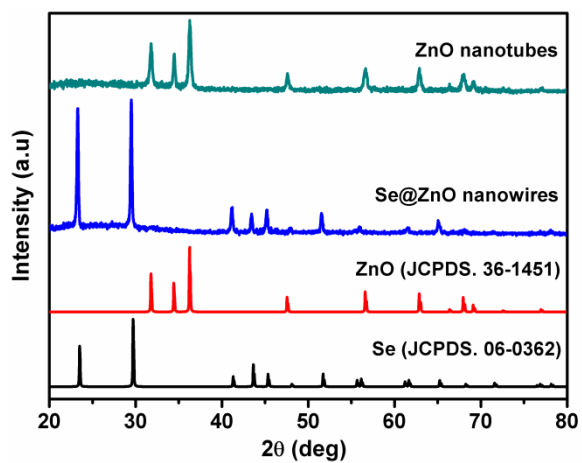

Fig. S7 XRD patterns of Se@ZnO core-shell nanowires and ZnO nanotubes.

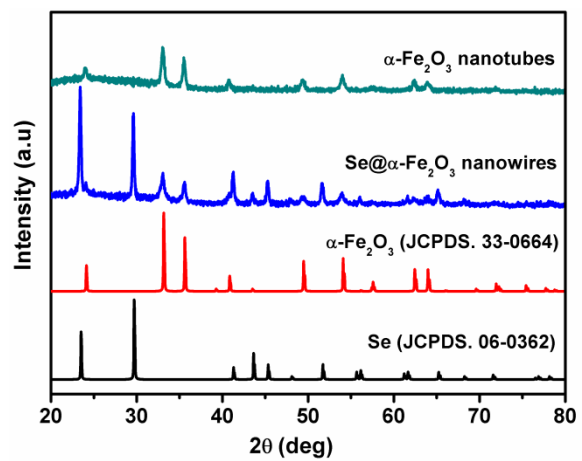

Fig. S8 XRD patterns of Se@Fe<sub>2</sub>O<sub>3</sub> core-shell nanowires and Fe<sub>2</sub>O<sub>3</sub> nanotubes.

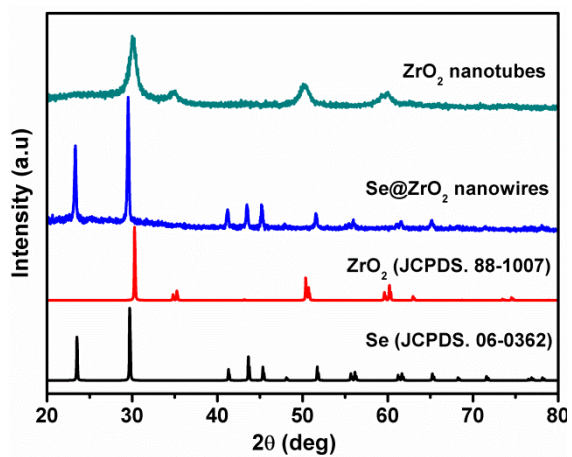

**Fig. S9** XRD patterns of Se@ZrO<sub>2</sub> core-shell nanowires and ZrO<sub>2</sub> nanotubes.
